# Supplementary material for: Surface modification of polymeric electrospun scaffoldsviaa potent and high-affinity integrin α4β1 ligand improved the adhesion, spreading and survival of human chorionic villus-derived mesenchymal stem cells: a new insight for fetal tissue engineering
Source: Royal Society of Chemistry journal article supplement (doi:10.1039/c9tb02309g), 2020-01-01
Supplement: c9tb02309g1.pdf [file c9tb02309g1.pdf]

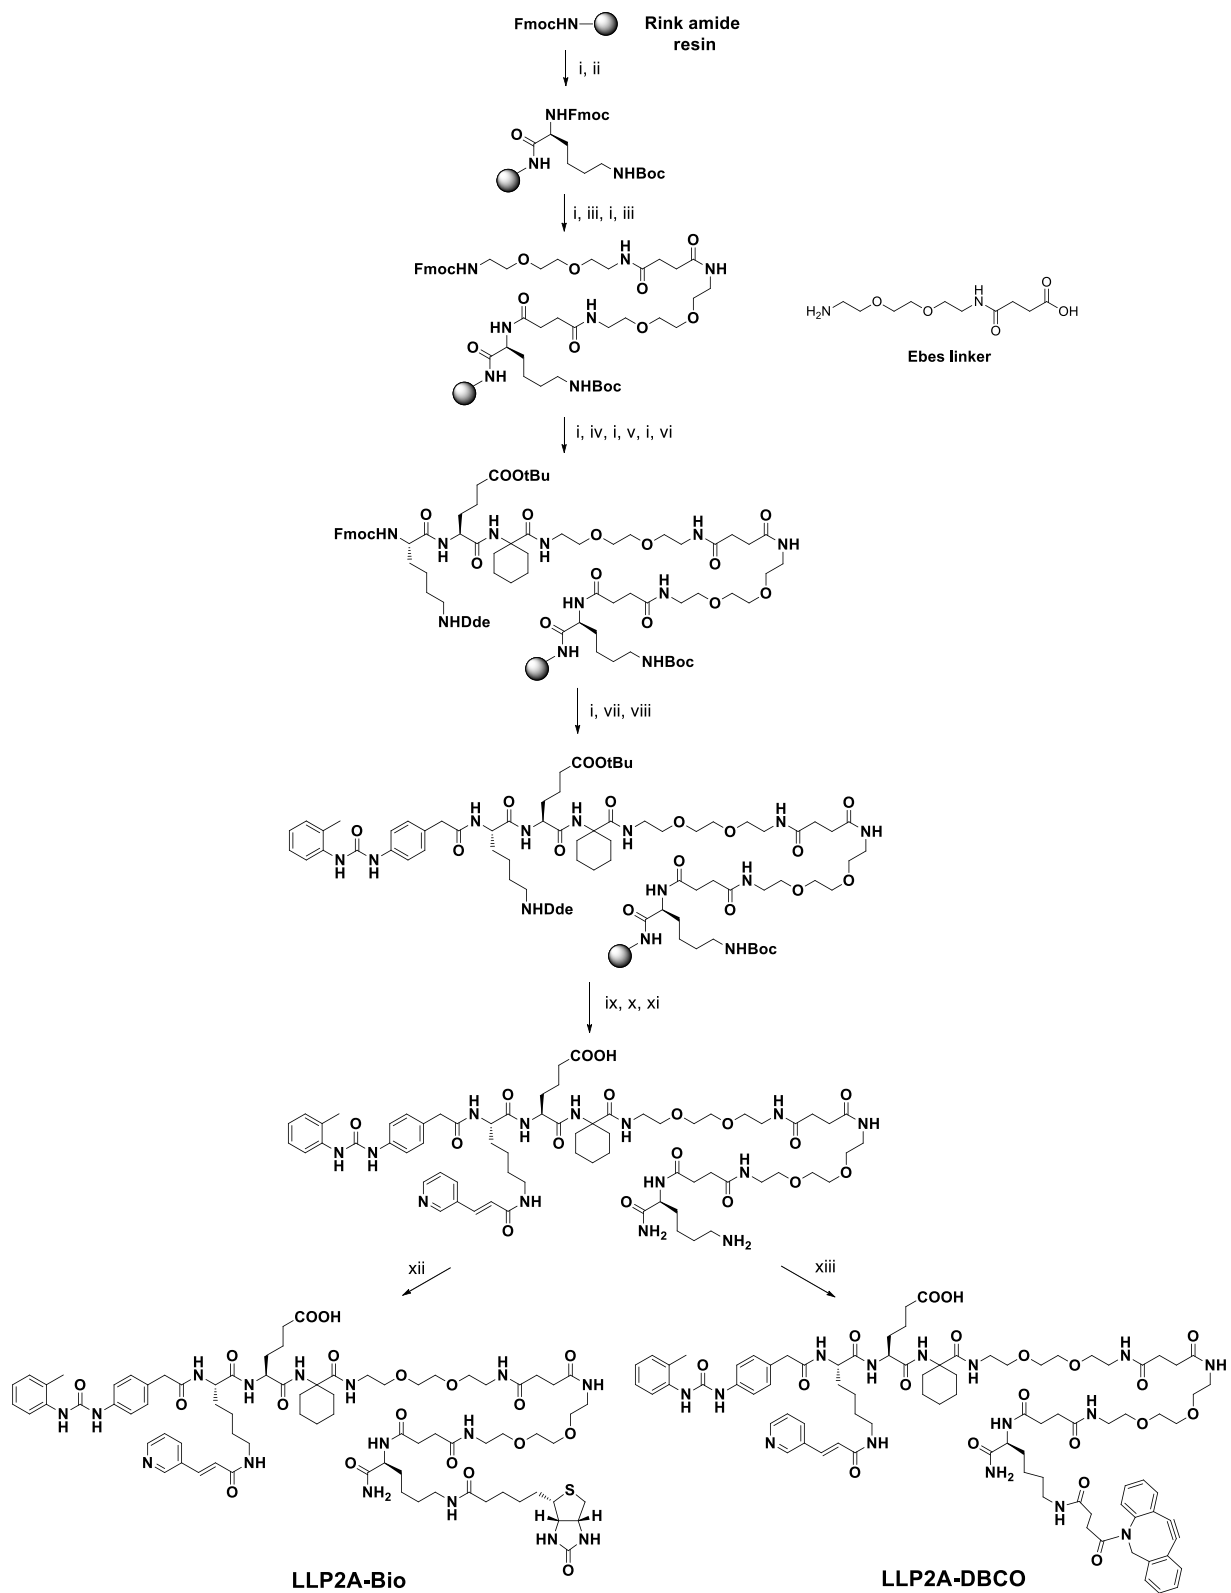

**SFig 1.** Synthetic schemes of LLP2A-Bio and LLP2A-DBCO

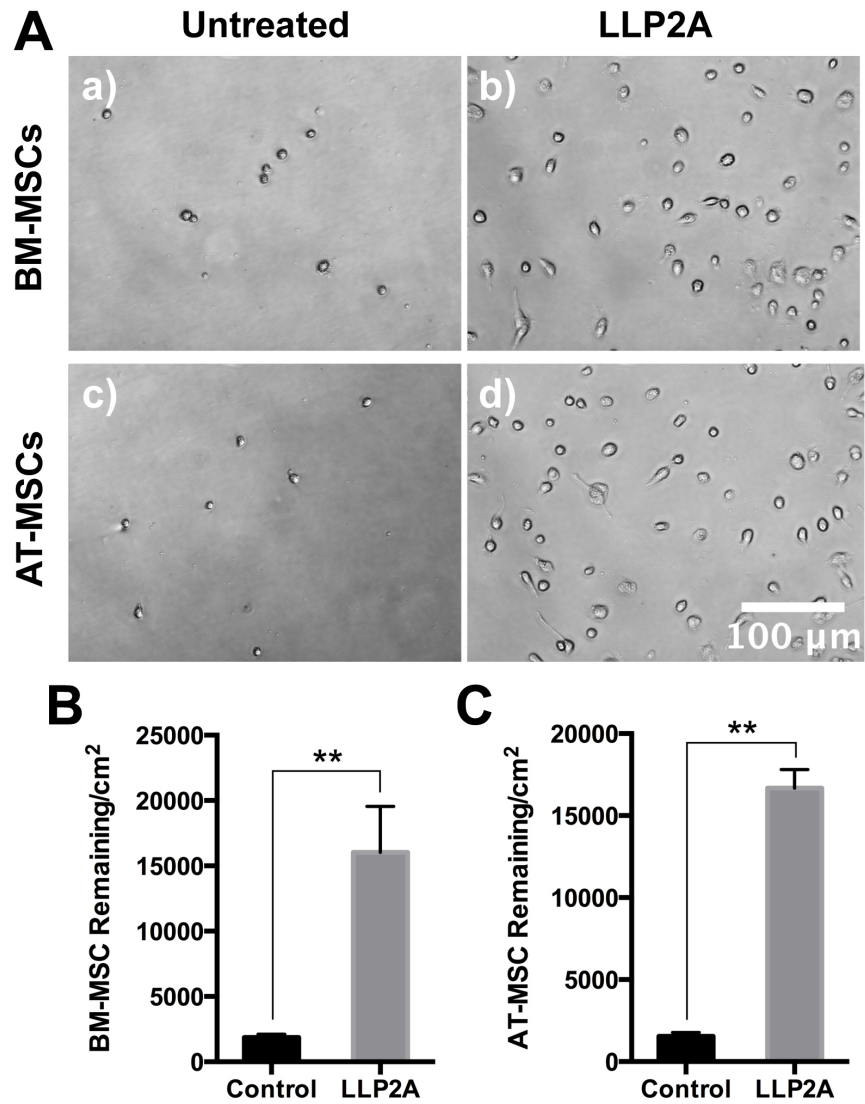

**SFig 2.** Attachment of BM-MSCs and AT-MSCs on LLP2A-treated surface. (A) Images of attached (a, b) BM-MSCs and (c, d) AT-MSCs on (a, c) untreated surface and (b, d) LLP2A-treated surface. The number of (B) BM-MSCs or (C) AT-MSCs attached to different surfaces was quantified, and statistical analyses were performed. Data were expressed as mean  $\pm$  standard deviation: \*\* $p < 0.01$  ( $n = 4$ ).

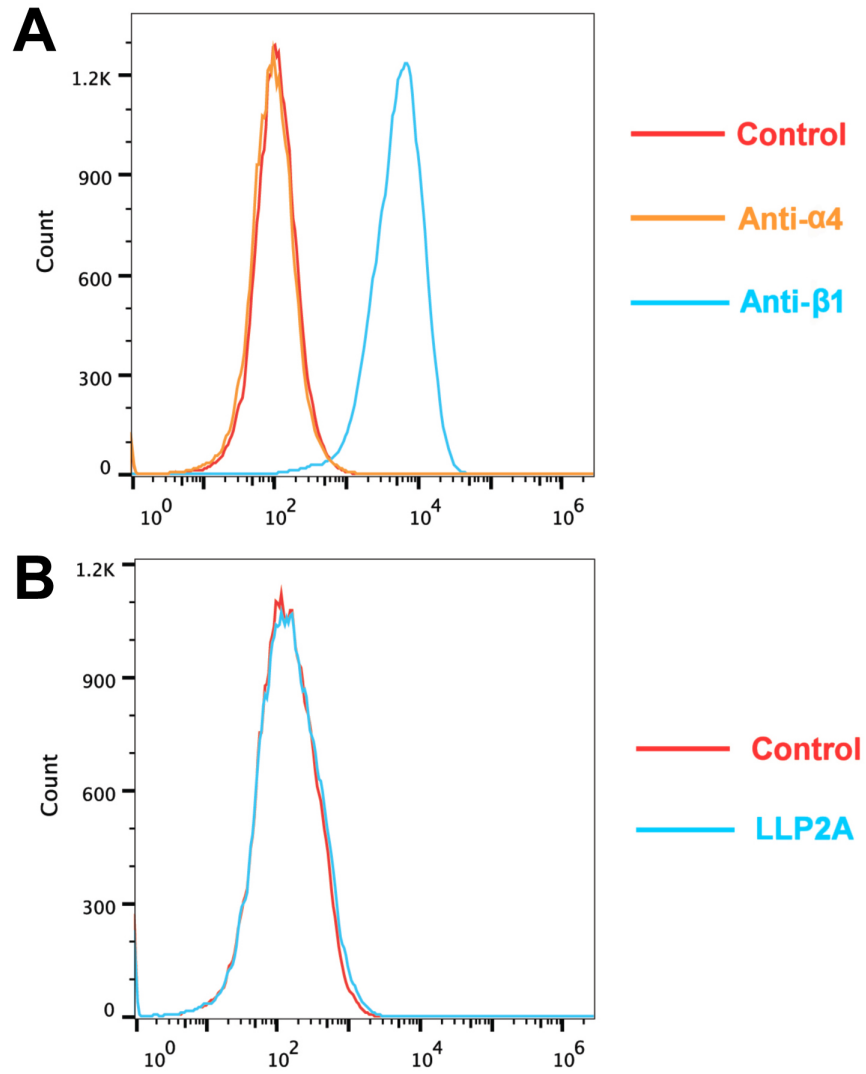

**SFig 3.** Binding mechanism of LLP2A to HCAECs. (A) HCAECs expressed integrin  $\beta$ 1 (blue curve), but did not express integrin  $\alpha$ 4 (orange curve). (B) LLP2A did not bind to HCAECs (blue curve).

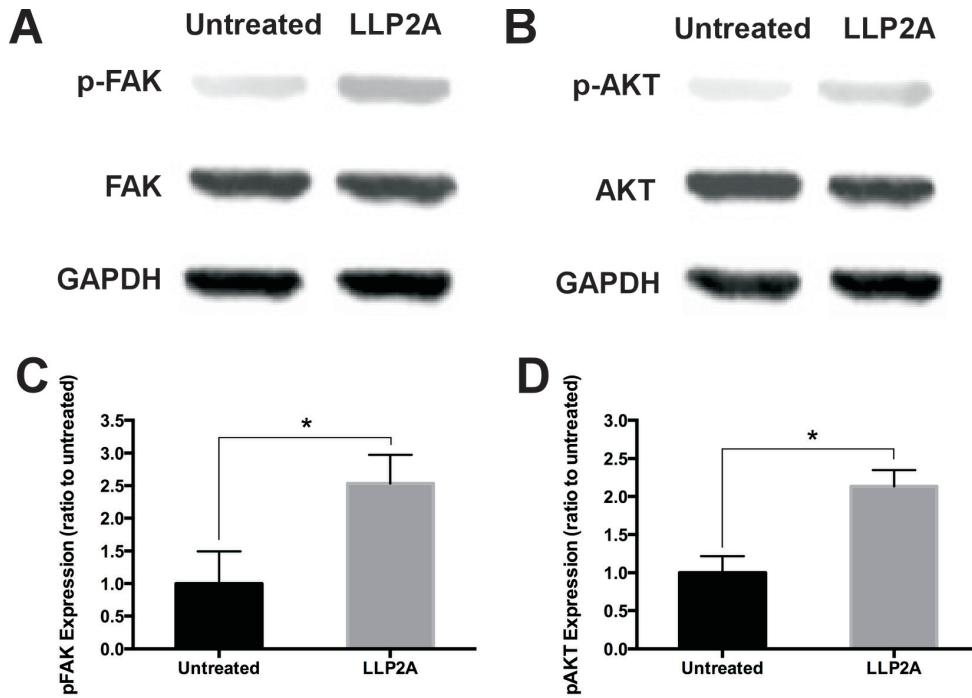

**SFig 4.** Effects of LLP2A modification on CV-MSC biological functions on the PLLA/PCL scaffold. Western-blot analysis for (A) phosphorylated-FAK (pFAK) and (B) phosphorylated-AKT (pAKT) in the CV-MSCs cultured on the untreated scaffold or LLP2A-modified scaffold. (C, D) Quantification and the correlative statistical analysis. Data were expressed as mean  $\pm$  standard deviation: \* $p < 0.05$  ( $n = 4$ ).
